# Supplementary material for: Web-based study on Chinese dermatologists’ attitudes towards artificial intelligence
Source: PubMed Central journal article supplement — Ann Transl Med. 2020 Jun;8(11):698. doi: 10.21037/atm.2019.12.102 (PMC7327314; doi:10.21037/atm.2019.12.102), 2020-06
Supplement: atm-08-11-698-supplementary.pdf [file atm-08-11-698-supplementary.pdf]

## **Survey of Chinese dermatologists' attitudes towards artificial intelligence**

Artificial intelligence (AI) has become an increasingly popular topic worldwide and is widely used in many fields, including in medicine and health. In China, AI has gradually attracted the attention of dermatologists since many hospitals all over the country have successfully released AI products for the diagnosis of skin diseases. However, little is known about the attitudes Chinese dermatologists have towards AI. This survey was authorized by the National Institute of Hospital Administration, National Health Commission of the People's Republic of China, to explore the Chinese dermatologists' awareness and opinions on AI. Groups from the China Digital Medicine Magazine, Chinese Skin Image Database (CSID), and UMER Doctor conducted this survey.

**Notice: This survey is an anonymous survey, and the survey results are only to be used for data analysis. Thank you for your cooperation.**

### **Part I: Basic information**

#### **1. Gender**

- Male
- Female

**2. Age:** \_\_\_\_ year-old

**3. Affiliation:** \_\_\_\_\_

#### **4. Education background**

- Bachelor's degree
- Master's degree

- Doctorate degree
- Others \_\_\_\_\_

**5. Ownership of your affiliation**

- Public medical institutions
- Private medical institutions
- Other \_\_\_\_\_

**6. The level of your hospital/affiliation**

- Primary hospital
- Secondary hospital
- Tertiary hospital
- Other \_\_\_\_\_

**7. Your professional title**

- Resident physician
- Attending physician
- Associate chief physician
- Chief physician
- Other \_\_\_\_\_

**Part II: AI information**

**1. How do you acquire information about artificial intelligence? (Check all that apply)**

- Internet (including by computer and mobile phone)
- Television
- Science fiction movies or novels
- Books, newspapers, or periodicals
- Meetings, or forums
- Others \_\_\_\_\_

**2. How much attention do you pay to artificial intelligence information? (Choose one)**

- Actively pay attention (actively search and concern for AI-related information)
- Passive-active attention (reading AI-related information when seen)

- General attention (sometimes reading AI-related information)
- Unconcerned (ignoring AI-related information)

**3. What role do you think artificial intelligence will play in dermatology? (Single choice)**

- Replace dermatologists' daily work
- Assisting the daily diagnosis and treatment activities for dermatologists
- Useless
- Unconcerned

**4. Which level of hospitals do you think need artificial intelligence the most? (Choose one)**

- Tertiary hospitals
- Secondary hospitals
- Primary hospitals
- Others (community health service stations, private clinics, and village clinics)

**5. Which kinds of skin diseases do you think artificial intelligence should be applied to?**

**(Check all that apply)**

- Skin tumors
- Psoriasis
- Acne
- Vitiligo
- Melanonychia
- Alopecia disease
- Allergic dermatitis
- Others \_\_\_\_\_

**(Thank you once again for your cooperation!)**
